# Supplementary material for: A novel CXCR4-targeted near-infrared (NIR) fluorescent probe (Peptide R-NIR750) specifically detects CXCR4 expressing tumors
Source: PubMed Central journal article supplement (PMC5451476; doi:10.1038/s41598-017-02818-6), 2017-05-31
Supplement: 41598_2017_2818_MOESM1_ESM.pdf [file 41598_2017_2818_MOESM1_ESM.pdf]

A novel CXCR4-targeted near-infrared (NIR) fluorescent probe (Peptide R-NIR750) specifically detects CXCR4 expressing tumors.

Sara Santagata<sup>1</sup>, Luigi Portella<sup>1</sup>, Maria Napolitano<sup>1</sup>, Adelaide Greco<sup>2,3,4</sup>, Crescenzo D'Alterio<sup>1</sup>, Maria Vittoria Barone<sup>5</sup>, Antonio Luciano<sup>6</sup>, Matteo Gramanzini<sup>2,4</sup>, Luigi Auletta<sup>7</sup>, Claudio Arra<sup>6</sup>, Antonella Zannetti<sup>2,4#\*</sup> and Stefania Scala<sup>1#\*</sup>

<sup>1</sup>Functional Genomics, Istituto Nazionale per lo Studio e la Cura dei Tumori, Fondazione “G. Pascale”-IRCCS-Napoli , Italy.

<sup>2</sup>Institute of Biostructure and Bioimaging, National Research Council, Naples, Italy.

<sup>3</sup>Department of Advanced Biomedical Science, Federico II University Medical School, Naples, Italy.

<sup>4</sup>CEINGE-Advanced Biotechnologies, Naples, Italy;

<sup>5</sup>Department of Translational Medical Science and European Laboratory for the Investigation of Food Induced Disease (ELFID), University of Naples, Federico II, Via S. Pansini 5, 80131, Naples, Italy.

<sup>6</sup>Animal Facility Unit, Istituto Nazionale per lo Studio e la Cura dei Tumori, Fondazione “G. Pascale”-IRCCS-Napoli, Italy.

<sup>7</sup>IRCCS SDN, Naples, Italy.

# A. Zannetti and S. Scala contributed equally to this work

## Supplementary Figure S1

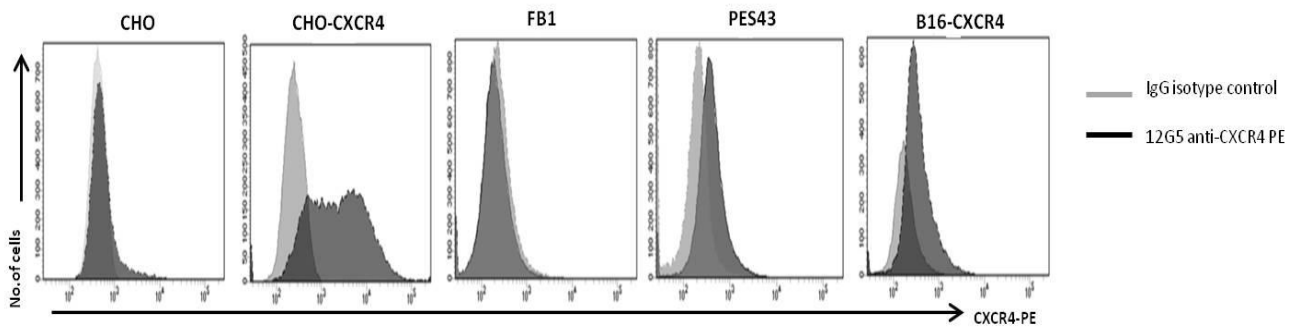

| Cell Lines | CXCR4 (%)<br>(12G5 anti-CXCR4 PE) |
|------------|-----------------------------------|
| CHO        | 0.9                               |
| CHO-CXCR4  | 82                                |
| FB1        | 5,6                               |
| PES43      | 69                                |
| B16-CXCR4  | 79                                |

### Supplementary Figure S1 legend

**Figure S1.** CXCR4 profile in CHO, CHO-human CXCR4, FB1, PES43 and B16 -human CXCR4 cells through flow cytometry. Cells were incubated with the phycoerythrin (PE) conjugated anti-hCXCR4 (clone 12G5).

## Supplementary Figure S2

A

Peptide R

Arg-Ala-[Cys-Arg-Phe-Phe-Cys]

B

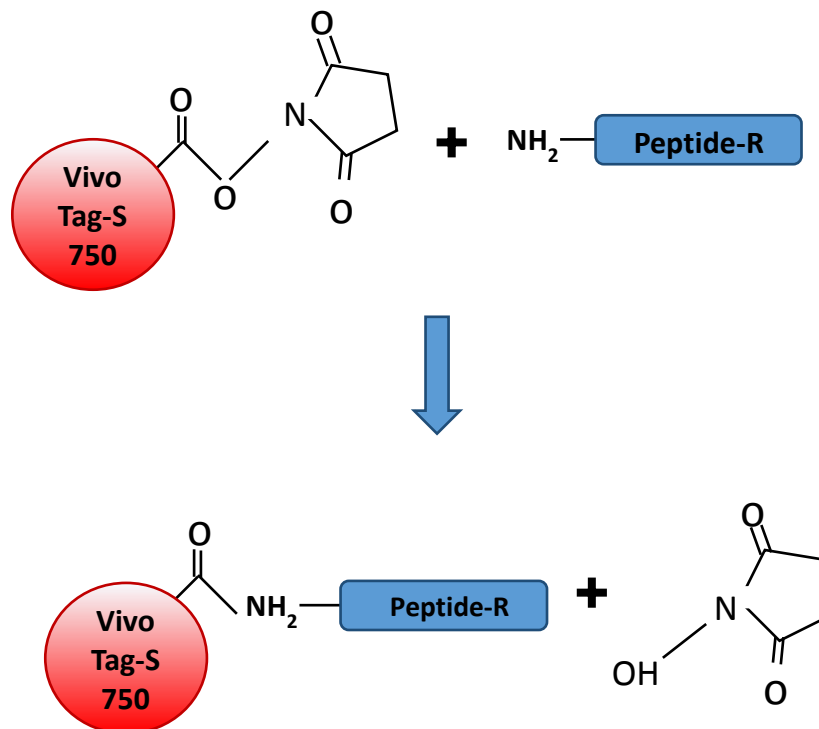

## Supplementary Figure S2 legend

**Figure S2.** (A) Amino acid composition of CXCR4 peptide; (B) Illustration of Peptide R and VivoTag-S 750-N-hydroxysuccinimide (NHS) ester conjugation.
